# Supplementary material for: WASP-mediated regulation of anti-inflammatory macrophages is IL-10 dependent and is critical for intestinal homeostasis
Source: PubMed Central journal article supplement (PMC5934380; doi:10.1038/s41467-018-03670-6), 2018-05-03
Supplement: 41467_2018_3670_MOESM1_ESM.pdf [file 41467_2018_3670_MOESM1_ESM.pdf]

# **WASP mediated regulation of anti-inflammatory macrophages is IL-10 dependent and is critical for intestinal homeostasis**

**Biswas et al.**

Supplemental Figure

a

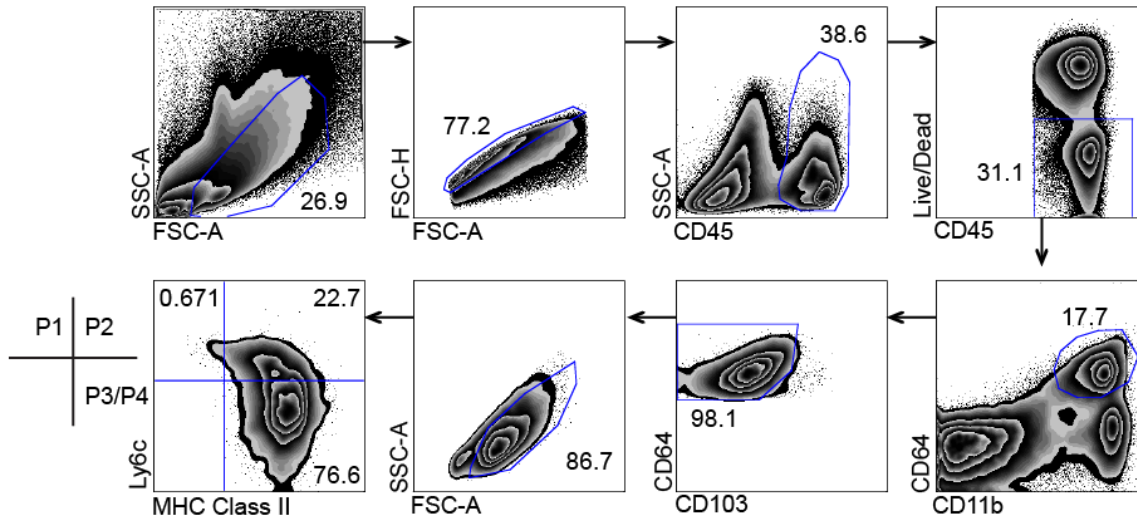

b

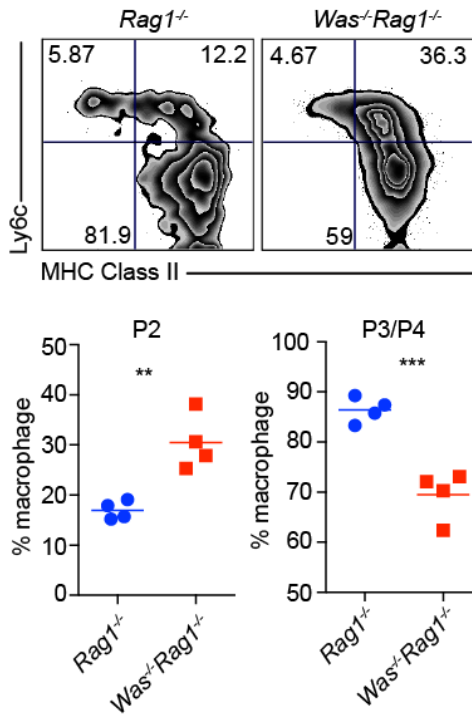

c

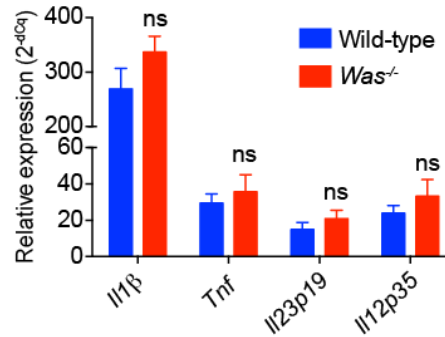

**Supplemental Figure 1. Defective anti-inflammatory M $\phi$  in the colon of *Was*<sup>-/-</sup> *Rag1*<sup>-/-</sup> mice.** (a) Flow cytometry gating strategy for the analysis of lamina propria macrophages using *Was*<sup>-/-</sup> mice. Quadrant marking shows pro- (P2; Ly6c<sup>+</sup>MHCII<sup>+</sup>) and anti-inflammatory (P3+P4; Ly6c<sup>+</sup>MHCII<sup>-</sup>) subsets. FACS plot was representative of three independent experiments. (b) Flow cytometric analysis of LP macrophages in WT (wild-type) (n=4) and *Was*<sup>-/-</sup> *Rag1*<sup>-/-</sup> (n=4) mice at 12 weeks of age followed by quantification of pro- (P2) and anti-inflammatory (P3+P4) subsets. Macrophages were gated as live CD45<sup>+</sup>CD11b<sup>+</sup>CD103<sup>-</sup>CD64<sup>+</sup> cells. FACS plot was representative of three independent experiments. Unpaired Student's t-test was performed to determine difference between two groups. \*\**p* < 0.01, \*\*\**p* < 0.001. (c) Expression of pro-inflammatory genes in sorted P2 macrophages from WT (n=12) and *Was*<sup>-/-</sup> (n=12) mice. P2 cells from three mice are pooled together to increase RNA yield. Unpaired Student's t-test was performed to determine difference between two groups. *ns*: not significant.

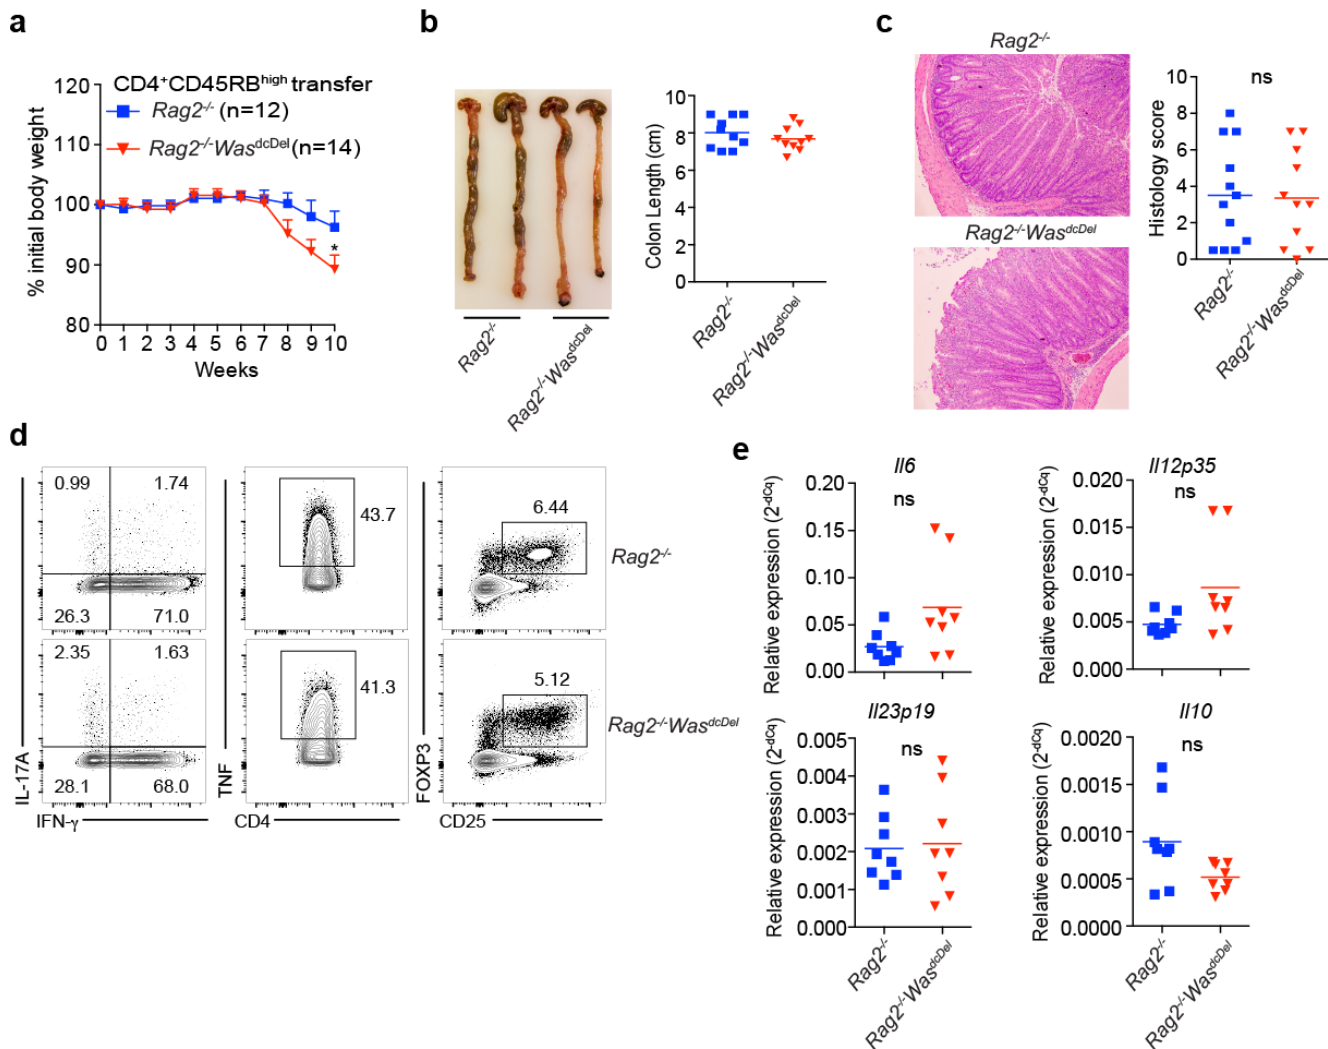

**Supplementary Figure 2. DC-specific expression of WASP is not critical for the regulation of T cell transfer induced colitis.** Naïve CD4<sup>+</sup>CD25<sup>+</sup>CD45RB<sup>high</sup> T cells ( $3-5 \times 10^5$ ) from WT (wild-type) mice were transferred intraperitoneally into *Rag2*<sup>-/-</sup> and *Was*<sup>dcDel</sup>*Rag2*<sup>-/-</sup> mice to induce colitis. **(a)** % initial body weight (mean $\pm$ SEM) was plotted for *Rag2*<sup>-/-</sup> (n=12) and *Was*<sup>dcDel</sup>*Rag2*<sup>-/-</sup> (n=14) mice. Two-way ANOVA was used to determine statistical significance. \* $p < 0.05$ . Data are cumulative of three independent experiments. **(b)** Ten weeks after transfer colons were removed and colon length was measured. *Rag2*<sup>-/-</sup> (n=10) and *Was*<sup>dcDel</sup>*Rag2*<sup>-/-</sup> (n=10). Data are cumulative of three independent experiments. Unpaired Student's t-test was performed to determine difference between two groups. ns: not significant. **(c)** Representative photomicrographs of H&E stained colonic section and histological score of *Rag2*<sup>-/-</sup> (n=12) and *Was*<sup>dcDel</sup>*Rag2*<sup>-/-</sup> (n=11) mice at 10 weeks following naïve T cell transfer. Data are cumulative of three independent experiments. Unpaired Student's t-test was performed to determine difference between two groups. ns: not significant. **(d)** Flow cytometry plots shows percentage of TNF<sup>+</sup>, IFN- $\gamma$ <sup>+</sup>, IL-17A<sup>+</sup> and FoxP3<sup>+</sup> helper T cells in the lamina propria of *Rag2*<sup>-/-</sup> and *Was*<sup>dcDel</sup>*Rag2*<sup>-/-</sup>. FACS plot was representative of three independent experiments. **(e)** Cytokine expression was measured by qPCR from the colonic tissue of *Rag2*<sup>-/-</sup> (n=8) and *Was*<sup>dcDel</sup>*Rag2*<sup>-/-</sup> (n=8) mice 10 weeks after T cell transfer. Data are cumulative of two independent experiments. Unpaired Student's t-test was performed to determine difference between two groups. ns: not significant.

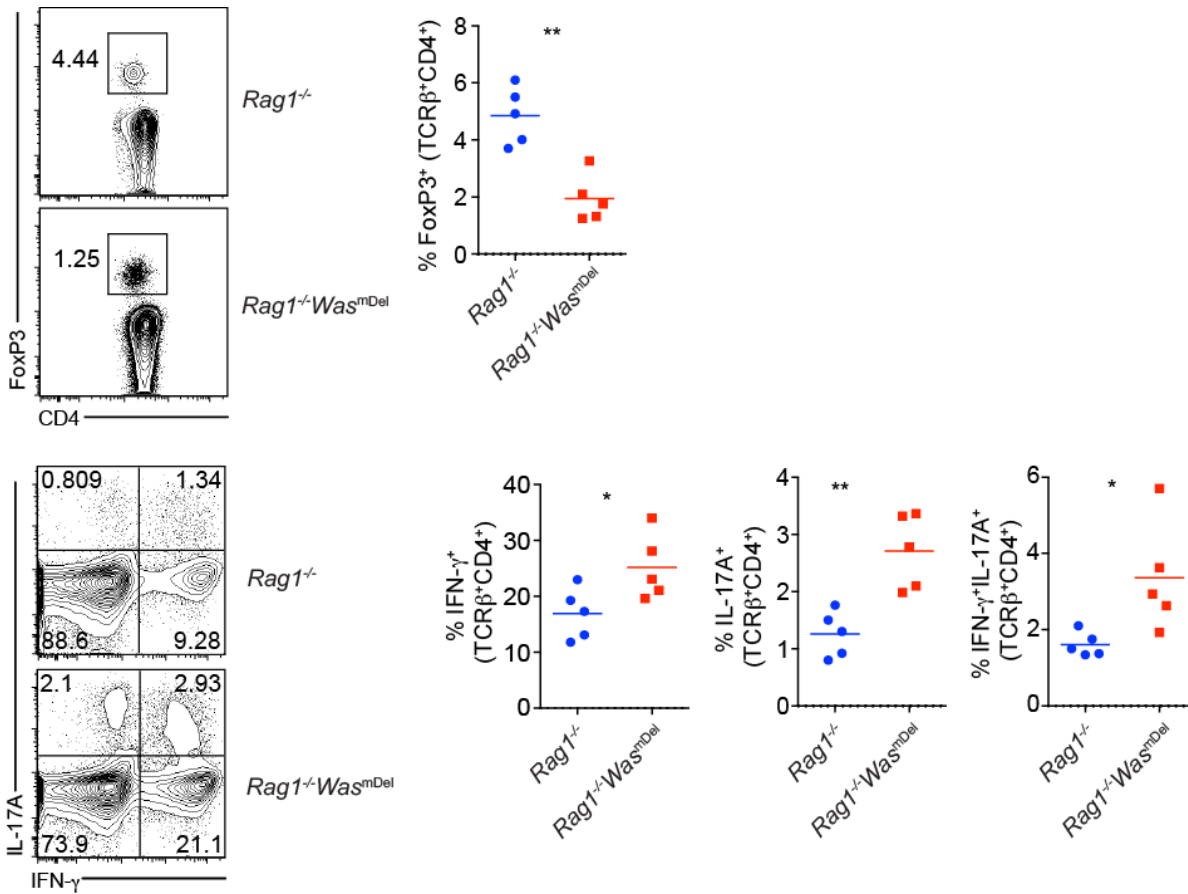

**Supplementary Figure 3. Mφ-specific expression of WASP is critical for Treg generation and regulation of Th1 and Th17 cell in MLN.** Naïve CD4<sup>+</sup>CD25<sup>-</sup>CD45RB<sup>high</sup> T cells (3-5 X 10<sup>5</sup>) from WT (wild-type) mice were transferred intraperitoneally into *Rag1*<sup>-/-</sup> (n= 5) and *Was*<sup>mDel</sup>*Rag1*<sup>-/-</sup> (n=5) mice to induce colitis. Flow cytometry plots show percentage of FoxP3<sup>+</sup> (upper panel) IFN-γ<sup>+</sup> and IL-17A<sup>+</sup> (lower panel) helper T cells in the MLN of *Rag1*<sup>-/-</sup> and *Was*<sup>mDel</sup>*Rag1*<sup>-/-</sup> mice at six week after T cell transfer. FACS plot was representative of two independent experiments. Unpaired Student's t-test was performed to determine difference between two groups. \**p* < 0.05, \*\**p* < 0.01, \*\*\**p* < 0.001.

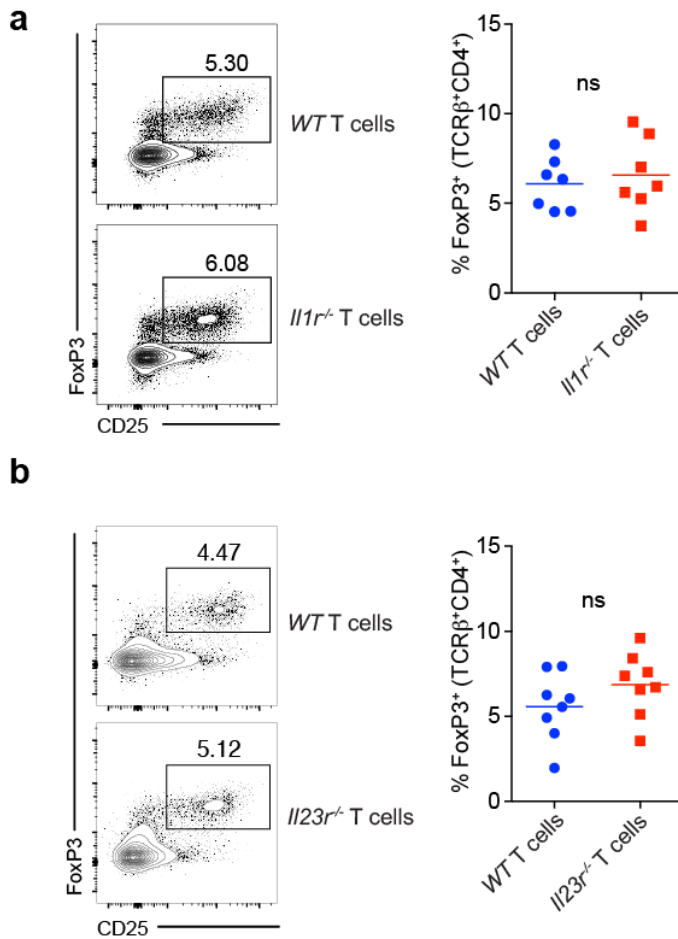

**Supplementary Figure 4. Colonic Treg cell generation in *Was<sup>mDel</sup>Rag1<sup>-/-</sup>* mice following *Il1r<sup>-/-</sup>* and *Il23r<sup>-/-</sup>* naïve CD4<sup>+</sup> T cell transfer** (a) Naïve CD4<sup>+</sup>CD25<sup>+</sup>CD45RB<sup>high</sup> T cells ( $3-5 \times 10^5$ ) from WT (wild-type) or *Il1r<sup>-/-</sup>* mice were transferred intraperitoneally into *Was<sup>mDel</sup>Rag1<sup>-/-</sup>* mice to induce colitis. Flow cytometry plots shows percentage of FoxP3<sup>+</sup> helper T cells in the LP. Results were shown for individual mouse (WT, n=7; *Il1r<sup>-/-</sup>*, n=7). Data are cumulative of two independent experiments. (b) Naïve CD4<sup>+</sup>CD25<sup>+</sup>CD45RB<sup>high</sup> T cells ( $3-5 \times 10^5$ ) from WT or *Il23r<sup>-/-</sup>* mice were transferred intraperitoneally into *Was<sup>mDel</sup>Rag1<sup>-/-</sup>* mice to induce colitis. Flow cytometry plots shows percentage of FoxP3<sup>+</sup> helper T cells in the LP. Results were shown for individual mouse (WT, n=8; *Il1r<sup>-/-</sup>*, n=8). Data are cumulative of two independent experiments. Unpaired Student's t-test was performed to determine difference between two groups. *ns*: not significant.

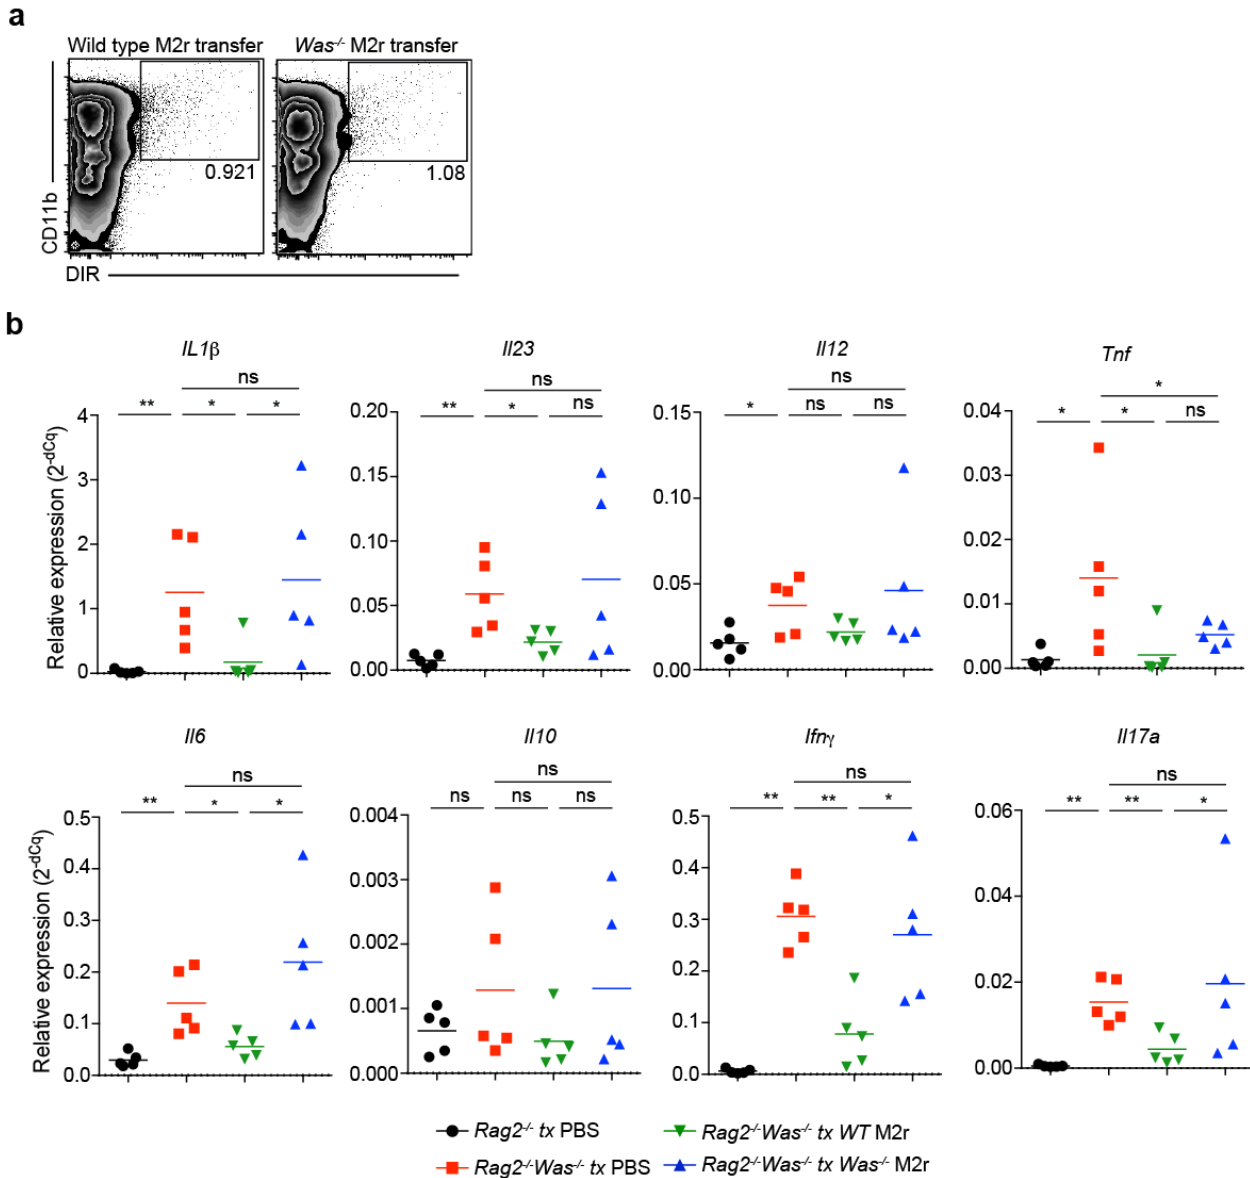

**Supplementary Figure 5. Wild type M2r M $\phi$  restored the expression of inflammatory mediators in *Was*<sup>-/-</sup>*Rag1*<sup>-/-</sup> mice from T cell transfer induced colitis. (a)** WT ( $2 \times 10^6$ ) and *Was*<sup>-/-</sup> M2r ( $2 \times 10^6$ ) macrophages were labelled with DIR and transferred via i.p. in *Was*<sup>-/-</sup>*Rag1*<sup>-/-</sup> mice. Seven days post transfer labelled M2r macrophages were analysed in the LP. Data are representative of two independent experiments **(b)** *Was*<sup>-/-</sup>*Rag1*<sup>-/-</sup> mice were transfer with PBS (n=5), WT M2r ( $2 \times 10^6$ ) (n=5) or *Was*<sup>-/-</sup> M2r ( $2 \times 10^6$ ) (n=5) macrophages one-day prior to WT CD4<sup>+</sup> T cells transfer. As a control *Rag1*<sup>-/-</sup> (n=5) were treated with PBS and transferred with WT CD4<sup>+</sup> T cells. Colonic expressions of cytokines were measured by qPCR. Results were shown for individual mouse. Data are cumulative of two independent experiments. Unpaired Student's t-test was performed to determine difference between groups. \* $p < 0.05$ , \*\* $p < 0.01$ , ns: not significant.

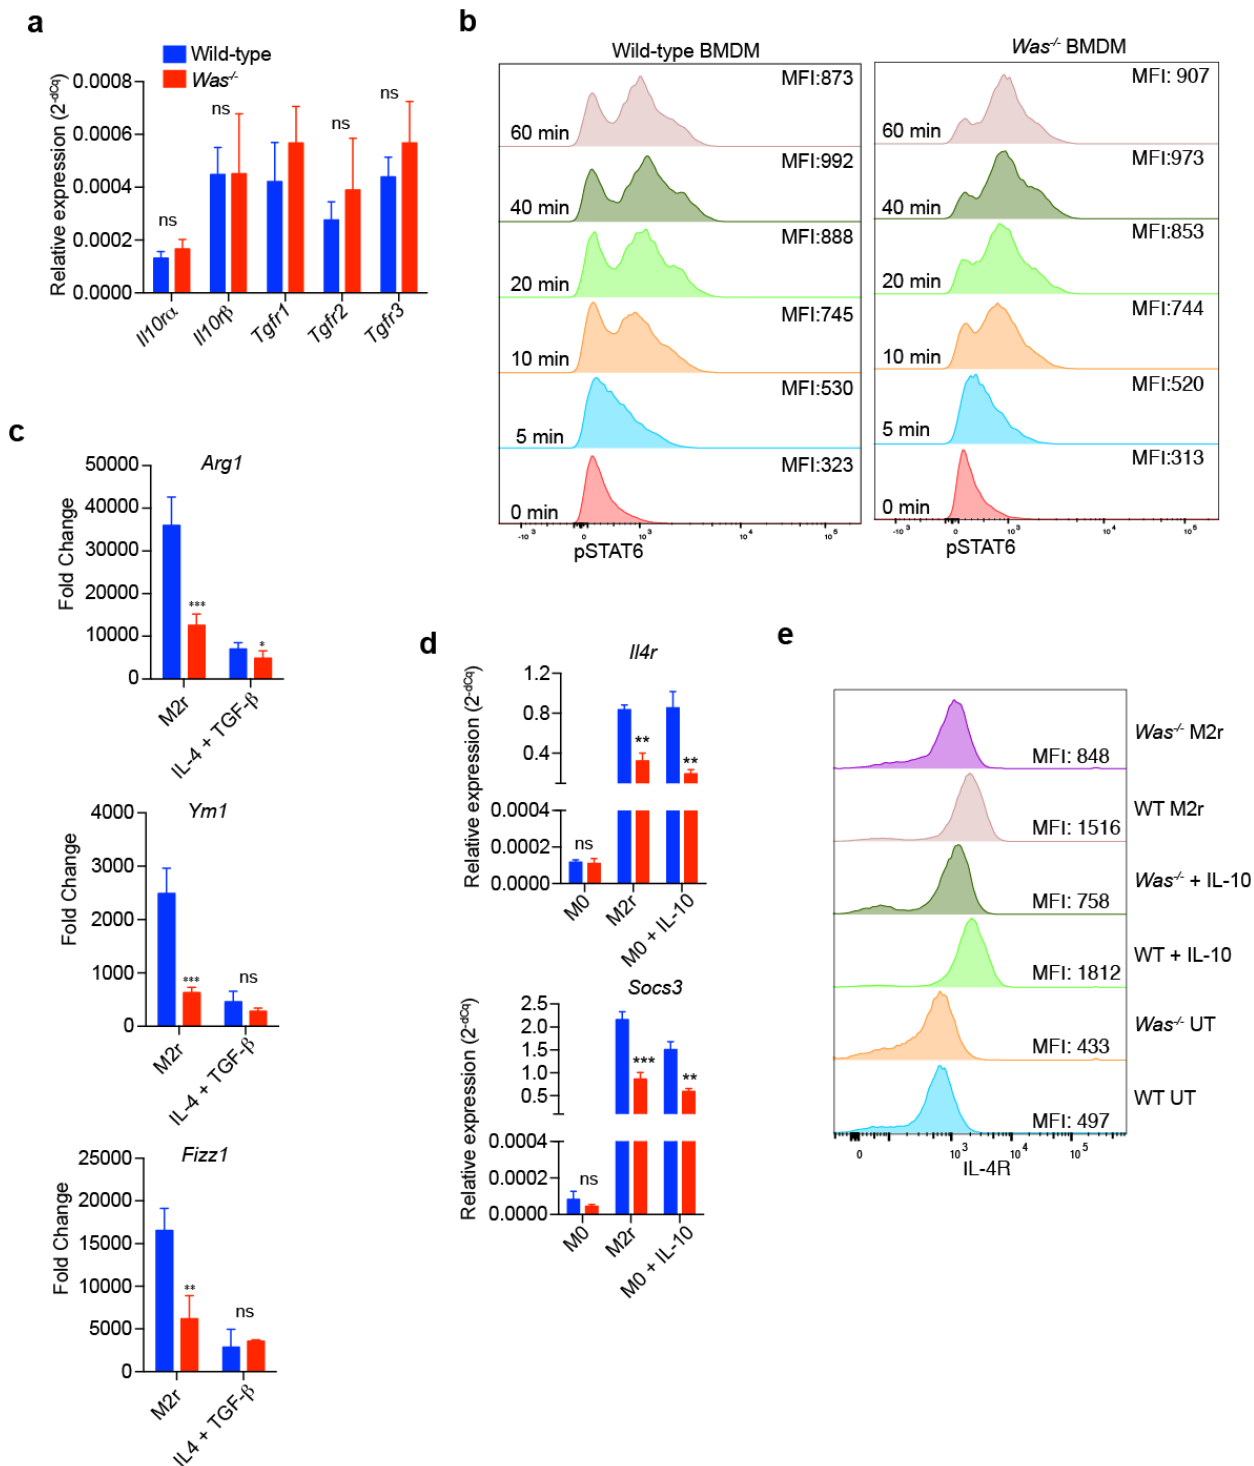

**Supplementary Figure 6. IL-10 mediated regulation of anti-inflammatory macrophages is impaired in absence of WASP. (a)** Expression of *Il10ra* and *Tgfr* in WT (wild-type) (n=4) and *Was*<sup>-/-</sup> (n=4) BMDMs was analysed by qPCR at homeostasis. Data are cumulative of two independent experiments. **(b)** WT and *Was*<sup>-/-</sup> BMDMs were cultured in presence of IL4 (20ng/ml) for the indicated time and pSTAT6 expression was analysed by flow cytometry. Data are representative of two independent experiments. **(c)** BMDM from WT (n=4) and *Was*<sup>-/-</sup> (n=4) mice were cultured in presence of IL-4, IL-10 and TGF-β (M2r) or IL-4 and TGF-β, and M2 specific genes expression was analysed by qPCR. Data are cumulative of two independent experiments. BMDM from WT and *Was*<sup>-/-</sup> mice were left untreated (M0), cultured in presence of IL-4, IL-10 and TGF-β (M2r) or IL-10 (M0+IL-10) for 24h. **(d)** Expression of *Il4r* and *Socs3* was analysed by qPCR (WT n=4;

Was<sup>-/-</sup> n=4). Data are cumulative of two independent experiments. (e) Cell surface expression of IL-4R was examined by flow cytometry. FACS plot is representative of two independent experiments. Data shown in **a,c** and **d** are mean  $\pm$  s.e.m. and P value was obtained by Student's t-test. \* $p < 0.05$ , \*\* $p < 0.01$ , \*\*\* $p < 0.001$ , *ns*: not significant.



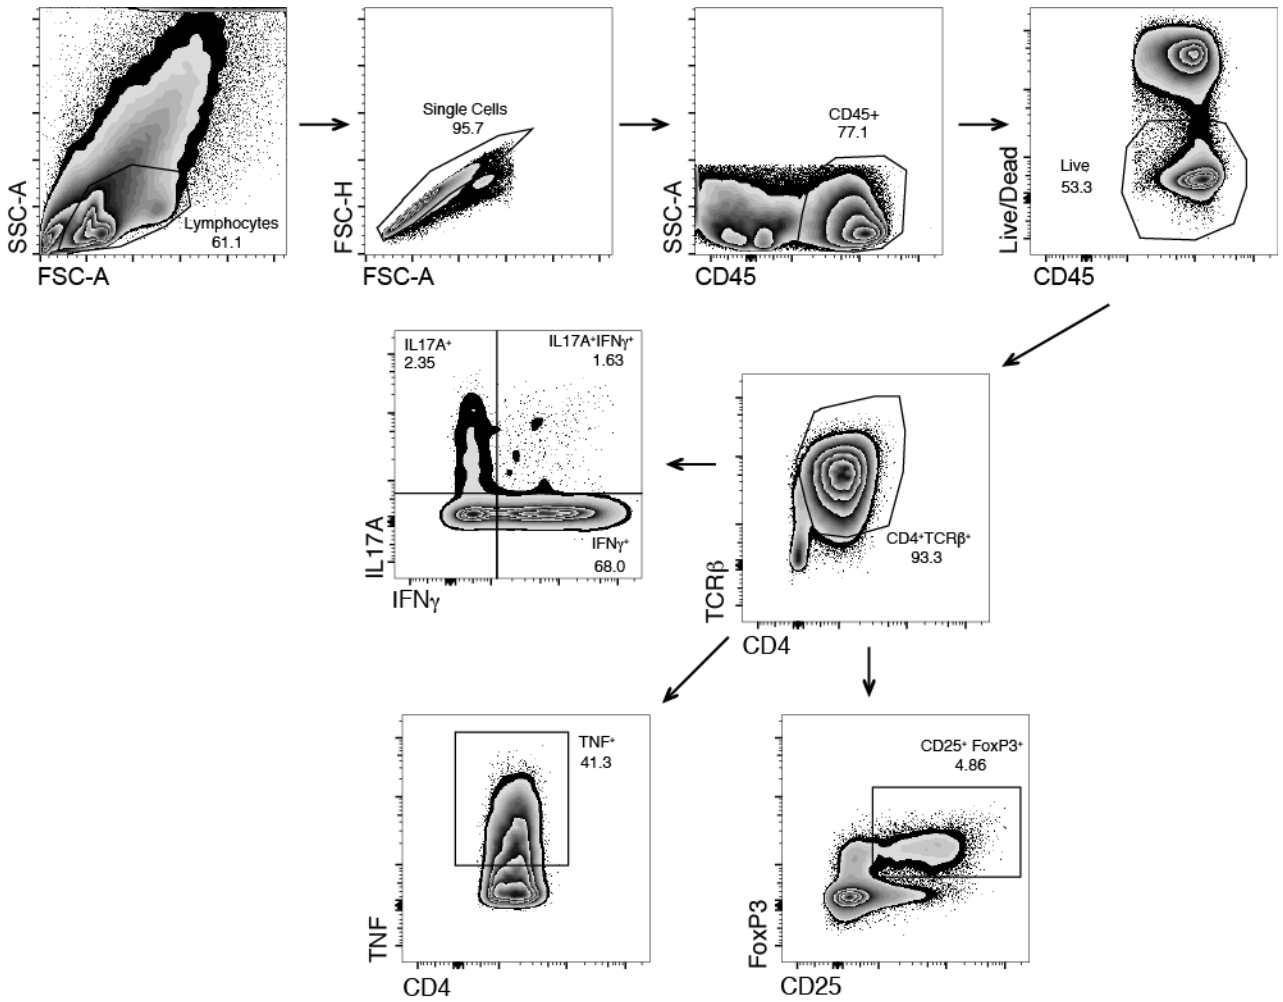

**Supplementary Figure 7.** Flow cytometry gating strategy for the analysis of various T cell subsets. Th1 (CD45<sup>+</sup>TCR $\beta$ <sup>+</sup>CD4<sup>+</sup>INF $\gamma$ <sup>+</sup>); Th17 (CD45<sup>+</sup>TCR $\beta$ <sup>+</sup>CD4<sup>+</sup>IL17A<sup>+</sup>); Th17/Th1 (CD45<sup>+</sup>TCR $\beta$ <sup>+</sup>CD4<sup>+</sup>IL17A<sup>+</sup> INF $\gamma$ <sup>+</sup>); Tregs (CD45<sup>+</sup>TCR $\beta$ <sup>+</sup>CD4<sup>+</sup>FoxP3<sup>+</sup>CD25<sup>+</sup>). This gating strategy was used to analyse T cell subsets in Fig. 2, 3 and 5.

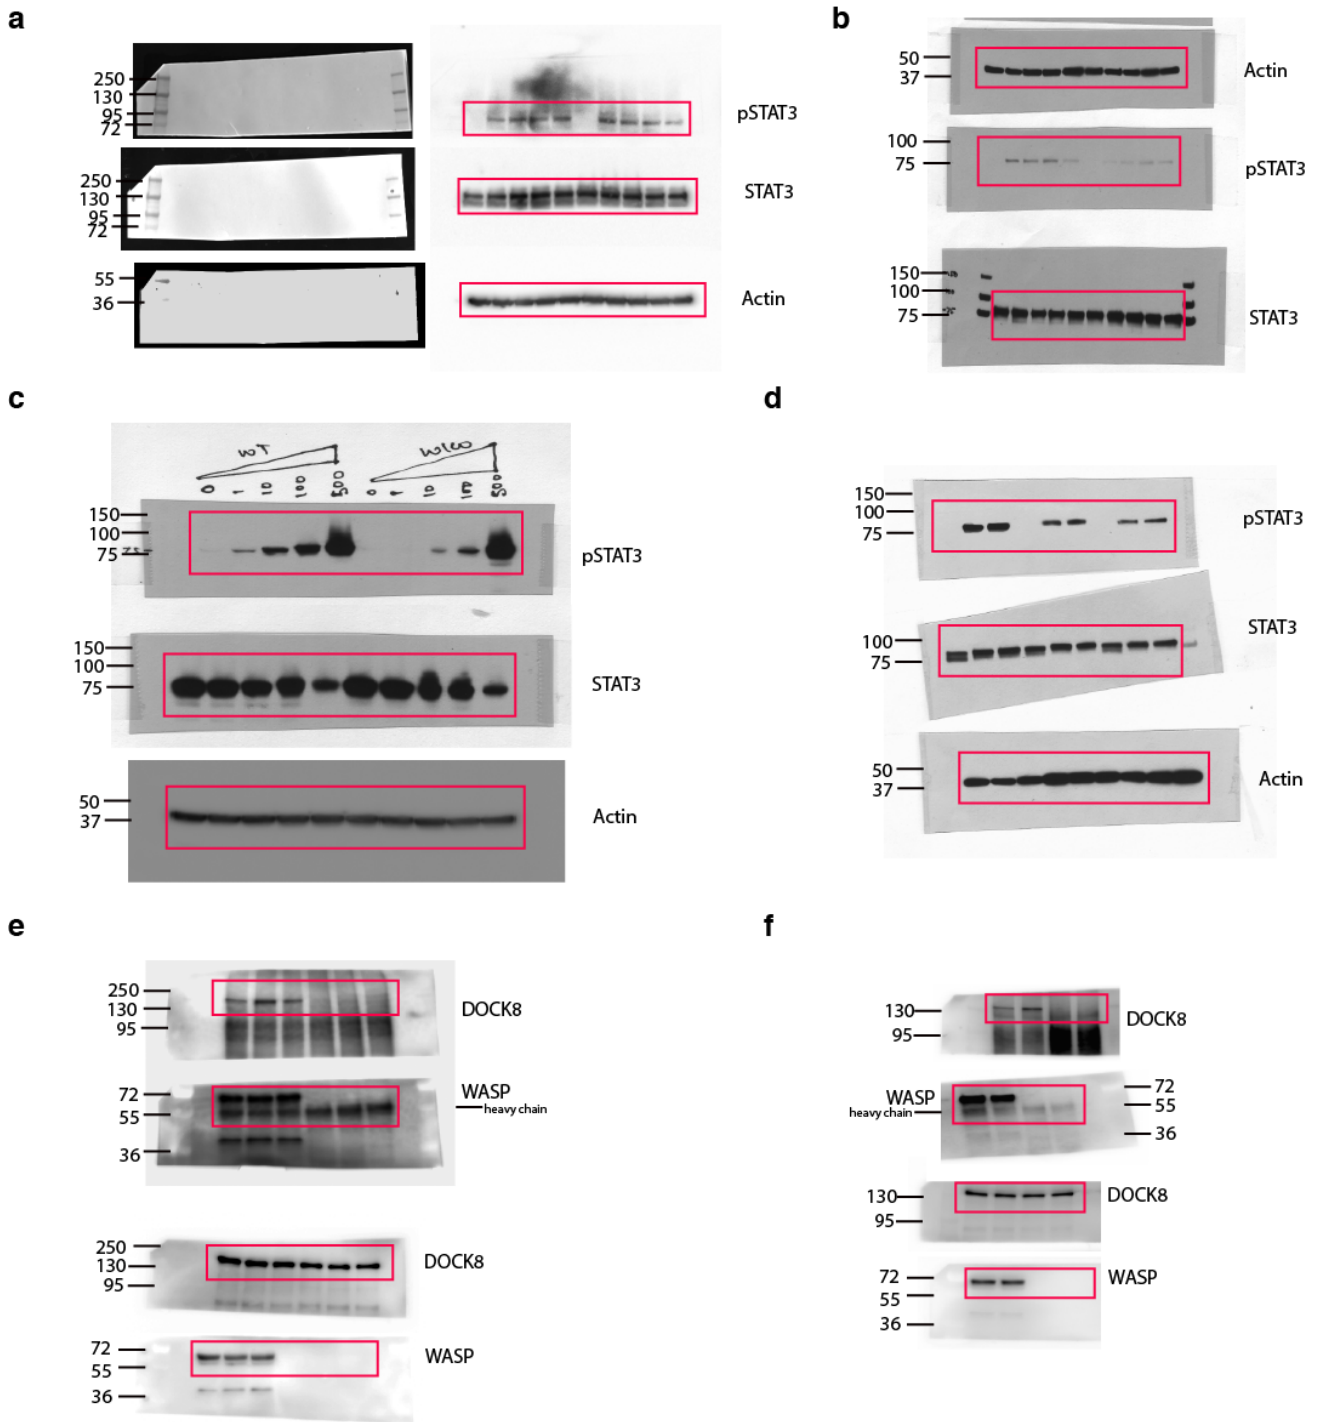

**Supplementary Figure 8.** Original data of immunoblots. **(a)** Immunoblot data corresponding to Fig. 6a. **(b)** Immunoblot data corresponding to Fig. 6b. **(c)** Immunoblot data corresponding to Fig. 6c. **(d)** Immunoblot data corresponding to Fig. 6d. **(e)** Immunoblot data corresponding to Fig. 6e. **(f)** Immunoblot data corresponding to Fig. 6f.

Supplementary table 1: Antibody used for flow cytometry and Western blotting

| <b>Antibody</b>         | <b>Clone</b> | <b>Dilution</b> | <b>Source</b>            |
|-------------------------|--------------|-----------------|--------------------------|
| Anti-mouse-CD45         | 30-F11       | 1:500           | Biolegend                |
| Anti-mouse-CD11b        | M1/70        | 1:2000          | Biolegend                |
| Anti-mouse-CD11c        | N418         | 1:200           | Biolegend                |
| Anti-mouse-CD4          | RM4-5        | 1:400           | Biolegend                |
| Anti-mouse-CD64         | X54-5/7.1    | 1:200           | Biolegend                |
| Anti-mouse-MHCII        | M5/114.15.2  | 1:2000          | Biolegend                |
| Anti-mouse-Ly6c         | HK1.4        | 1:1000          | Biolegend                |
| Anti-mouse-103          | 2E7          | 1:200           | Biolegend                |
| Anti-mouse-CD45.1       | A20          | 1:200           | Biolegend                |
| Anti-mouse-CD45.2       | 104          | 1:500           | Biolegend                |
| Anti-mouse-CD25         | PC61.5       | 1:200           | Biolegend                |
| Anti-mouse-TCRb         | H57-597      | 1:400           | Biolegend                |
| Anti-mouse-FoxP3        | FJK-16s      | 1:50            | eBioscience              |
| Anti-mouse-TNF          | MP6-XT22     | 1:200           | Biolegend                |
| Anti-mouse-IFN $\gamma$ | XMG1.2       | 1:200           | Biolegend                |
| Anti-mouse-IL17A        | eBio17B7     | 1:200           | eBioscience              |
| Anti-mouse-CD45RB       | C363-16A     | 1:200           | Biolegend                |
| Anti-mouse-WASP         | F-8          | 1:300           | Santa Cruz Biotechnology |
| Anti-mouse-Dock8        | G-2          | 1:500           | Santa Cruz Biotechnology |
| Anti-mouse-STAT3        | 9139         | 1:1000          | Cell Signaling           |
| Anti-mouse-pSTAT3       | 4113         | 1:1000          | Cell Signaling           |
| Anti-mouse-STAT6        | D3H4         | 1:1000          | Cell Signaling           |
| Anti-mouse-pSTAT6       | Ab28829      | 1:1000          | Abcam                    |
| Anti-mouse-pSTAT6       | 18/P-Stat6   | 1:20            | BDBiosciences            |
| Anti-human-CD4          | A161A1       | 1:200           | Biolegend                |
| Anti-human-TNF          | MAb11        | 1:200           | Biolegend                |
| Anti-human-IL10         | 3F9          | 1:50            | Biolegend                |

Supplementary table 2: Primer sequence

| Genes          | Forward sequence           | Reverse sequence           |
|----------------|----------------------------|----------------------------|
| <b>Mouse</b>   |                            |                            |
| <i>Hprt</i>    | GTTGGATACAGGCCAGACTTTGTTG  | GAGGGTAGGCTGGCCTATAGGCT    |
| <i>Il10</i>    | CAAGGAGCATTGAATTCCC        | GGCCTTGTAGACACCTTGGTC      |
| <i>Ifng</i>    | ACTGGCAAAGGATGGTGAC        | TGAGCTCATTGAATGCTTGG       |
| <i>Il17a</i>   | GGCCCTCAGACTACCTCAAC       | TCTCGACCCTGAAAGTGAAGG      |
| <i>Tnf</i>     | GACCCTCACACTCAGATCATCTTC   | CTCCTCCACTTGGTGGTTTG       |
| <i>Il1b</i>    | GCAACTGTTTCTGAACTCAACT     | ATCTTTTGGGGTCCGTCAACT      |
| <i>Nos2</i>    | GTTCTCAGCCCAACAATAACAAGA   | GTGGACGGGTCGATGTCAC        |
| <i>Il23p19</i> | GACCCACAAGGACTCAAGGA       | CATGGGGCTATCAGGGAGTA       |
| <i>Il12p35</i> | TGGATCTGAGCTGGACCCTT       | GCCAAAAGAGGAGGTAGCG        |
| <i>Tgfbr1</i>  | TCCCAACTACAGGACCTTTTTTCA   | GCAGTGGTAAACCTGATCCAGA     |
| <i>Tgfbr2</i>  | CCGCTGCATATCGTCCTGTG       | AGTGGATGGATGGTCCTATTACA    |
| <i>Tgfbr3</i>  | GGTGTGAACTGTCACCGATCA      | GTTTAGGATGTGAACCTCCCTTG    |
| <i>Il10ra</i>  | AGGCAGAGGCAGCAGGCCCCAGCAGA | TGGAGCCTGGCTAGCTGGTCACAGTA |
| <i>Il10rb</i>  | GCTGCCTTCAGACTCTTC         | AACCCCTCTGTGATCGGA         |
| <i>Arg1</i>    | CAGAAGAATGGAAGAGTCAG       | CAGATATGCAGGGAGTCACC       |
| <i>Ym1</i>     | CTGAGAAGCTCATTGTGGGA       | CTCAGTGGCTCCTTCATTCA       |
| <i>Fizz1</i>   | GCCTGGAACCTTTCCTGAG        | AGCTGGATTGGCAAGAAGTT       |
| <i>IL6</i>     | CTGCAAGAGACTTCCATCCAG      | AGTGGTATAGACAGGTCTGTTGG    |
| <i>Socs3</i>   | GGGTGGCAAAGAAAAGGAG        | GTTGAGCGTCAAGACCCAGT       |
| <i>IL4r</i>    | TCTGCATCCCCTTGTGTTTGC      | GCACCTGTGCATCCTGAATG       |
| <b>Human</b>   |                            |                            |
| <i>CXCL10</i>  | GTGGCATTCAAGGAGTACCTC      | TGATGGCCTTCGATTCTGGATT     |
| <i>CCR7</i>    | TGAGGTCACGGACGATTACAT      | GTAGGCCACGAAACAAATGAT      |
| <i>CCL13</i>   | CTCAACGTCCCATCTACTTGC      | TCTTCAGGGTGTGAGCTTTCC      |
| <i>SLC38A6</i> | GCTTTTGACAGTCCCTCTAATCC    | TTGATGTACTGGCACCAACTAC     |
| <i>MRC1</i>    | GGTTGCTATCACTCTCTATGC      | TTTCTTGTCTGTTGCCGTAGTT     |
| <i>CXCR4</i>   | ACGCCACCAACAGTCAGAG        | AGTCGGGAATAGTCAGCAGGA      |
| <i>IL10</i>    | GACTTTAAGGGTTACCTGGGTTG    | TCACATGCGCCTTGATGTCTG      |
| <i>IL6</i>     | ACTCACCTCTTCAGAACGAATTG    | CCATCTTTGGAAGGTTTCAGGTTG   |
| <i>TNF</i>     | GAGGCCAAGCCCTGGTATG        | CGGGCCGATTGATCTCAGC        |
| <i>IL23p19</i> | CAGCAACCCTGAGTCCCTAA       | TCAACATATGCAGGTCCCACT      |
| <i>IL1β</i>    | AATCTGTACCTGTCCTGCGTGTT    | TGGTAATTTTTGGGATCTACACTCT  |
